# Supplementary material for: Raf-1 Activation Prevents Caspase 9 Processing Downstream of Apoptosome Formation
Source: PubMed Central journal article supplement (PMC3100593; doi:10.1155/2011/834948), 2010-10-14
Supplement: 834948.f1.pdf [file 834948.f1.pdf]

**A**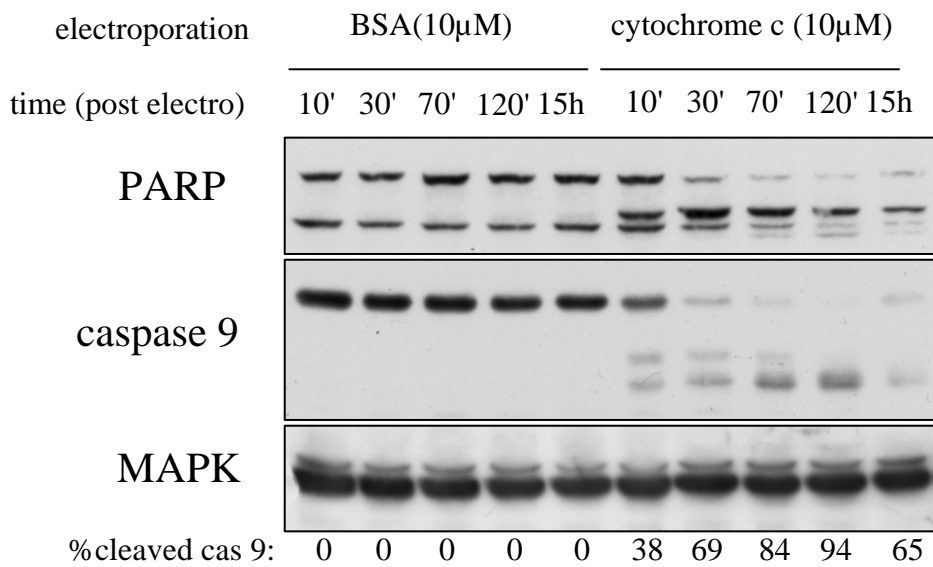**B**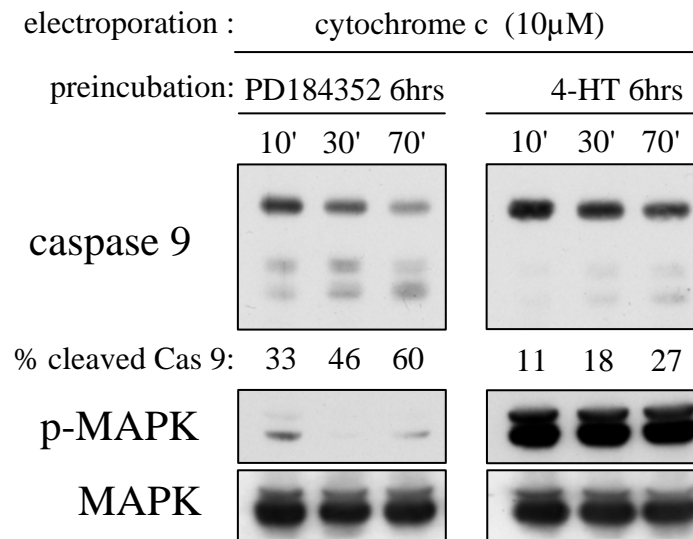

**Figure S1:** 4-HT preincubation prevents caspase 9 cleavage upon cytochrome c electroporation.

**A,** 10<sup>6</sup> exponentially growing CCL39- $\Delta$ Raf-1:ER cells were trypsinized and resuspended in PBS with the indicated concentration of cytochrome c or BSA, electroporated and allowed to recover in complete medium for the indicated time and lysed with 2%SDS. . The cell lysates were analyzed by immunoblotting. PARP cleavage is indicative of caspase activity.

**B,** Same as in A, except that the cells (in serum containing medium) were preincubated with a MEK inhibitor or 4-HT for 6 hours
