# Supplementary material for: Raf-1 Activation Prevents Caspase 9 Processing Downstream of Apoptosome Formation
Source: PubMed Central journal article supplement (PMC3100593; doi:10.1155/2011/834948), 2010-10-14
Supplement: 834948.f2.pdf [file 834948.f2.pdf]

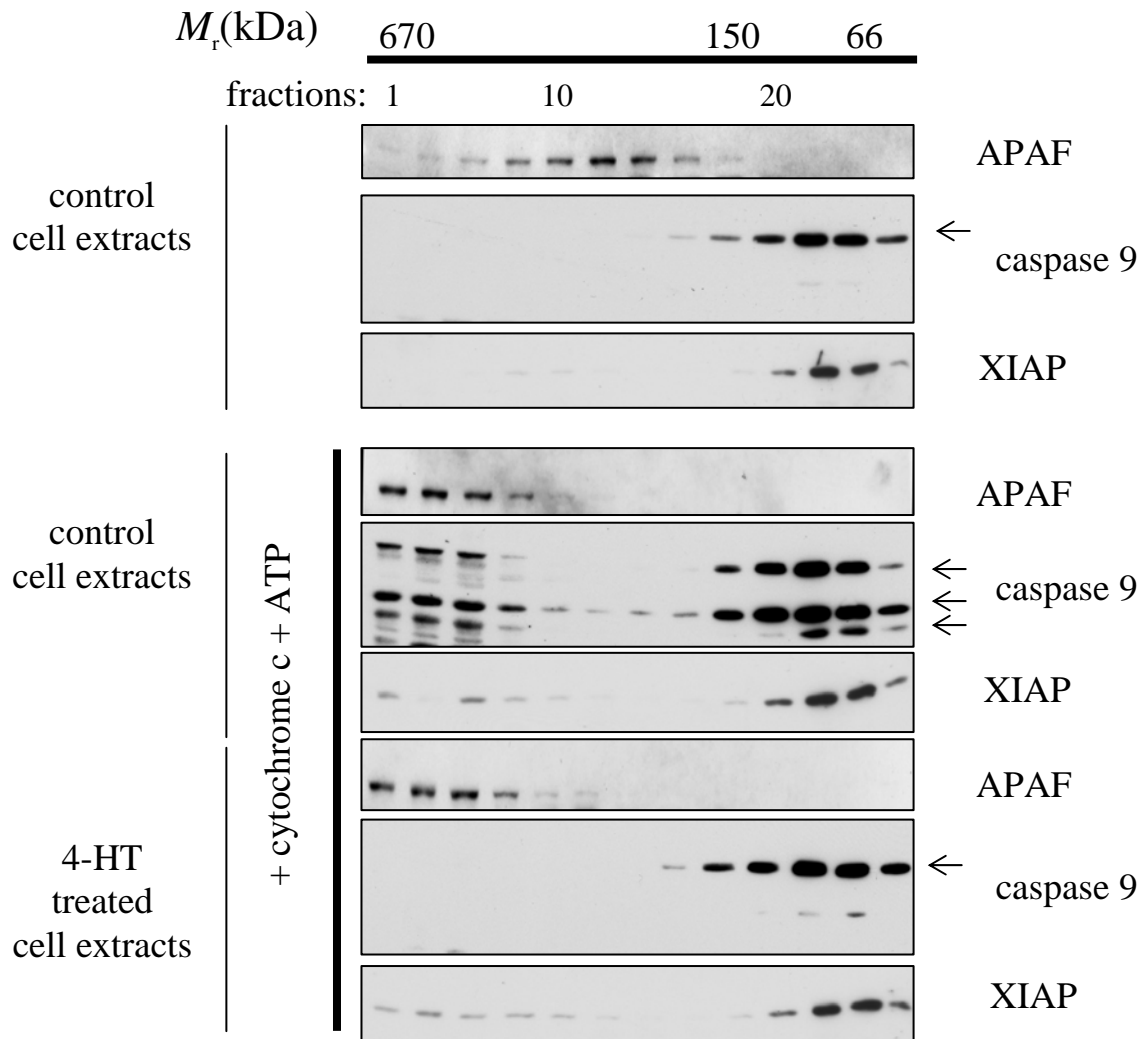

**Figure S2:** Recruitment of caspase 9 in the apoptosome following in vitro activation of cell extracts with cytochrome c and ATP.

Cell extracts from exponentially growing CCL39- $\Delta$ Raf-1:ER cells that were preincubated or not for 9 hours with 4-HT were activated as in figure 6 and analysed as in figure 7.
